# Supplementary material
Source: PubMed Central journal article supplement (PMC6644410)
Supplement: ao8b00934_si_001.pdf [file ao8b00934_si_001.pdf]

# Superstructure-Dependent Loading of DNA Origami Nanostructures with a Groove-Binding Drug

*Fabian Kollmann,<sup>†</sup> Saminathan Ramakrishnan,<sup>†</sup> Boxuan Shen,<sup>‡</sup> Guido Grundmeier,<sup>†</sup> Mauri A. Kostainen,<sup>‡</sup> Veikko Linko\*<sup>†,‡</sup> and Adrian Keller\*<sup>†</sup>*

<sup>†</sup> Technical and Macromolecular Chemistry, Paderborn University, Warburger Str. 100, 33098 Paderborn, Germany.

<sup>‡</sup> Biohybrid Materials, Department of Bioproducts and Biosystems, Aalto University, P. O. Box 16100, FI-00076 Aalto, Finland.

**Individual UV/Vis absorbance spectra of MB-DNA binding in water and buffer**

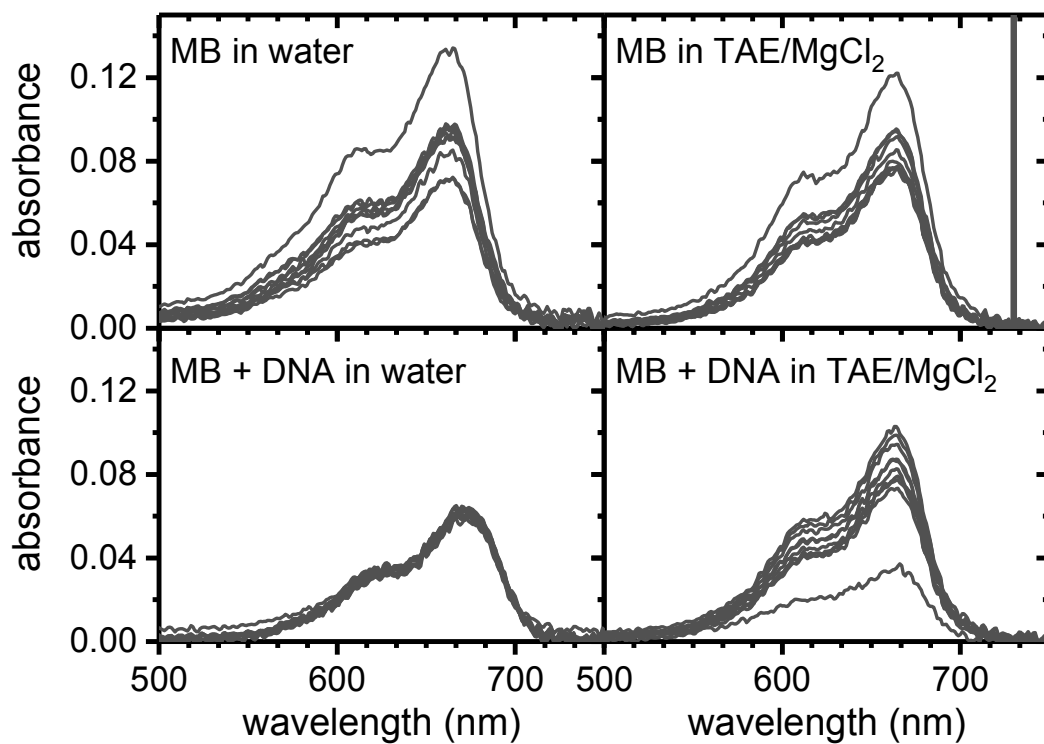

**Figure S1.** Individual UV/Vis absorbance spectra of 20  $\mu\text{M}$  MB with and without genomic dsDNA from salmon testes in water and  $\text{MgCl}_2$ -containing TAE buffer (see Figure 1a in the main article).

## Paired and unpaired bases in the different DNA origami designs

*Table S1: Numbers of base pairs and unpaired nucleotides from scaffold, staples, and overhangs of the DNA origami investigated in this work.*

| <b>DNA origami</b> | <b>base pairs</b> | <b>unpaired nucleotides</b> |
|--------------------|-------------------|-----------------------------|
| <b>6HB</b>         | 7,140             | 109                         |
| <b>60HB</b>        | 5,460             | 1,789                       |
| <b>Z shape</b>     | 6,942             | 1,155                       |
| <b>triangle</b>    | 7,196             | 51                          |
| <b>bow tie</b>     | 6,962             | 1,167                       |

## Netropsin competition assay for the different DNA origami nanostructures

The netropsin competition assay shown in Figure 1b of the main article has been repeated for all the DNA origami nanostructures investigated in this work. The results are shown in Figure S2. For all DNA origami nanostructures, an increase in absorption upon addition of large amounts of netropsin is observed, albeit to different extents. These differences may reflect different dependencies of netropsin and MB binding on minor groove dimensions.

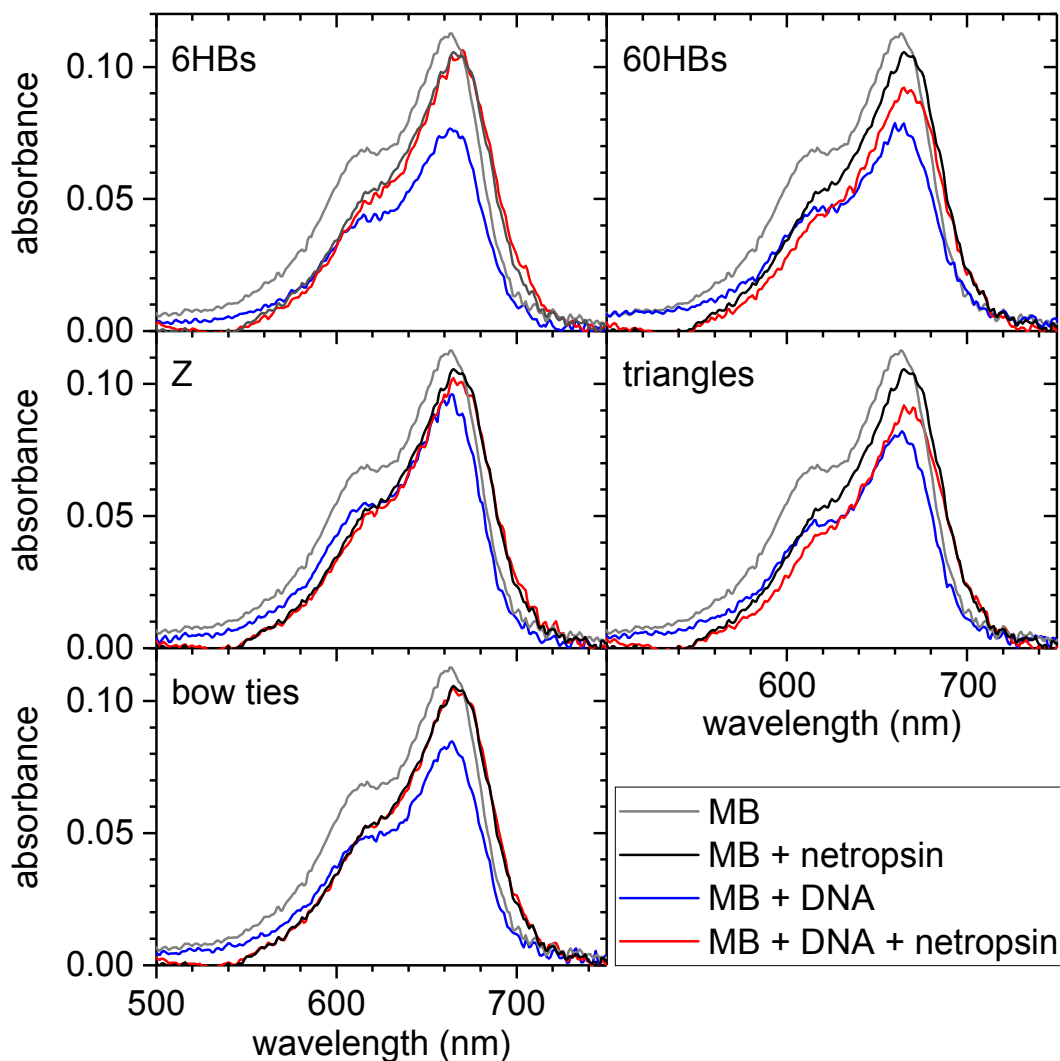

**Figure S2.** UV-Vis spectra of the competition between 20  $\mu\text{M}$  MB and 500  $\mu\text{M}$  netropsin for minor groove binding to the different DNA origami nanostructures in 1x TAE buffer supplemented with 10 mM  $\text{MgCl}_2$ . DNA origami concentrations were 7.3 nM (6HBs and 60HBs), 5.3 nM (Z shapes and bow ties), and 5.5 nM (triangles), respectively.

### Additional independent concentration series and binding isotherms

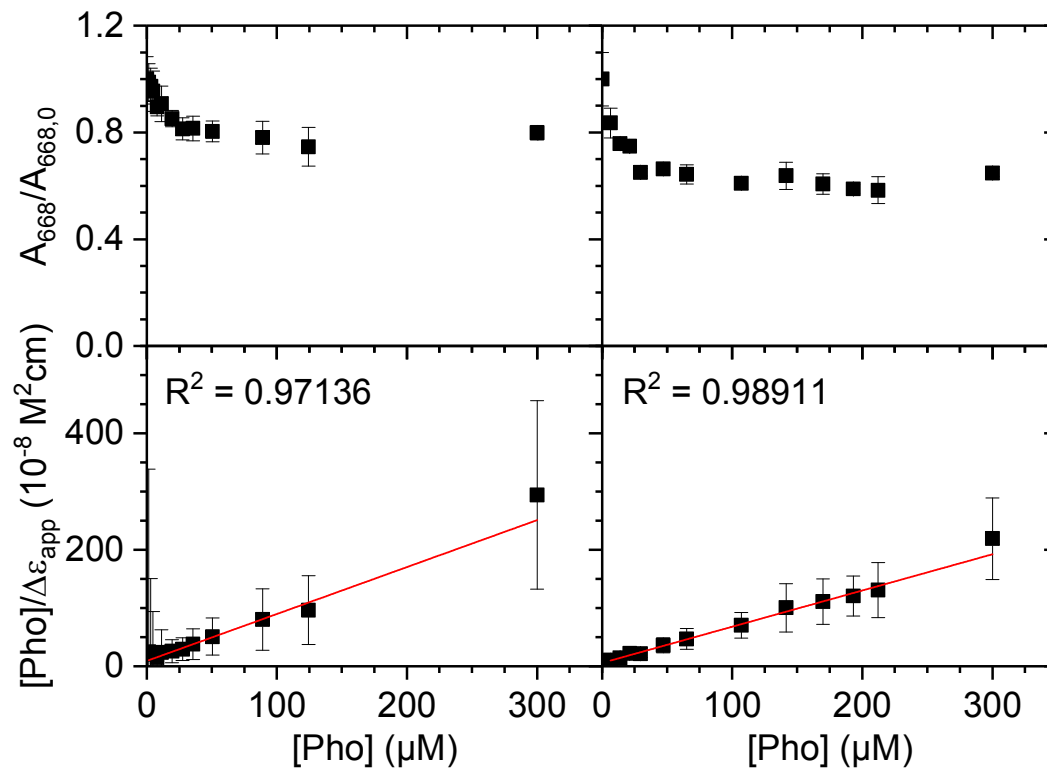

**Figure S3.** Additional independent concentration series and binding isotherms for dsDNA.

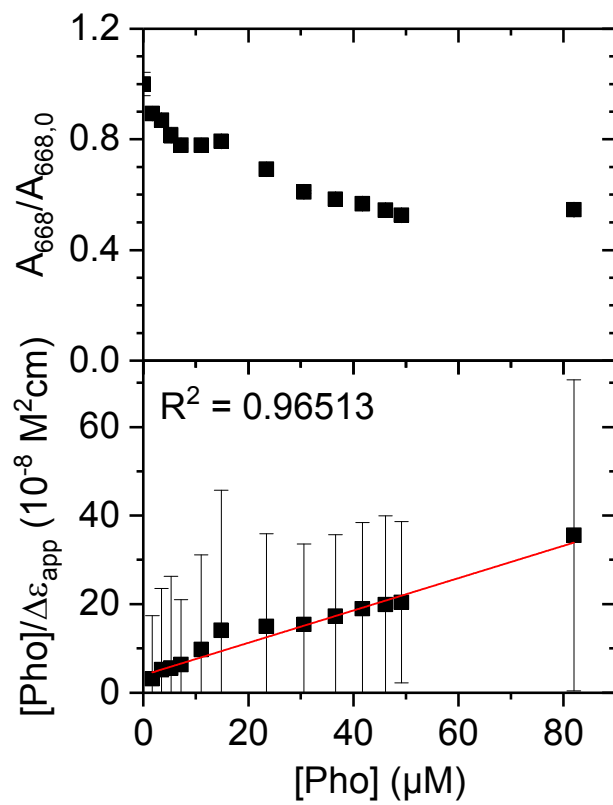

**Figure S4.** Additional independent concentration series and binding isotherm for 6HBs.

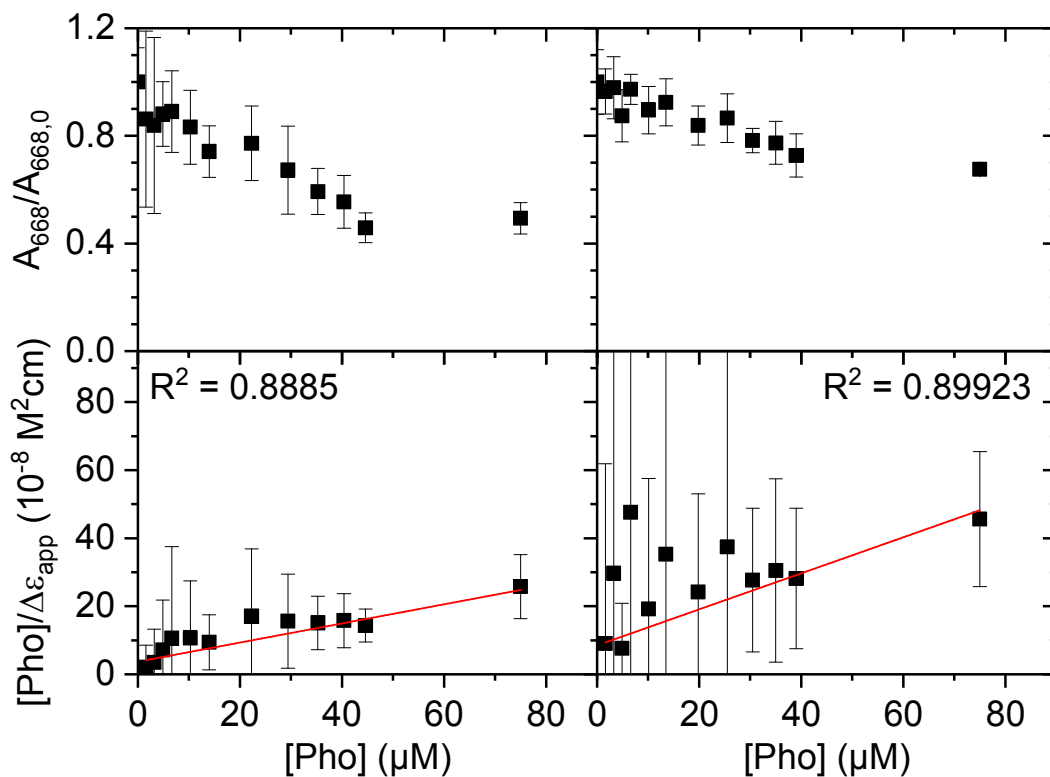

**Figure S5.** Additional independent concentration series and binding isotherms for 60HBs.

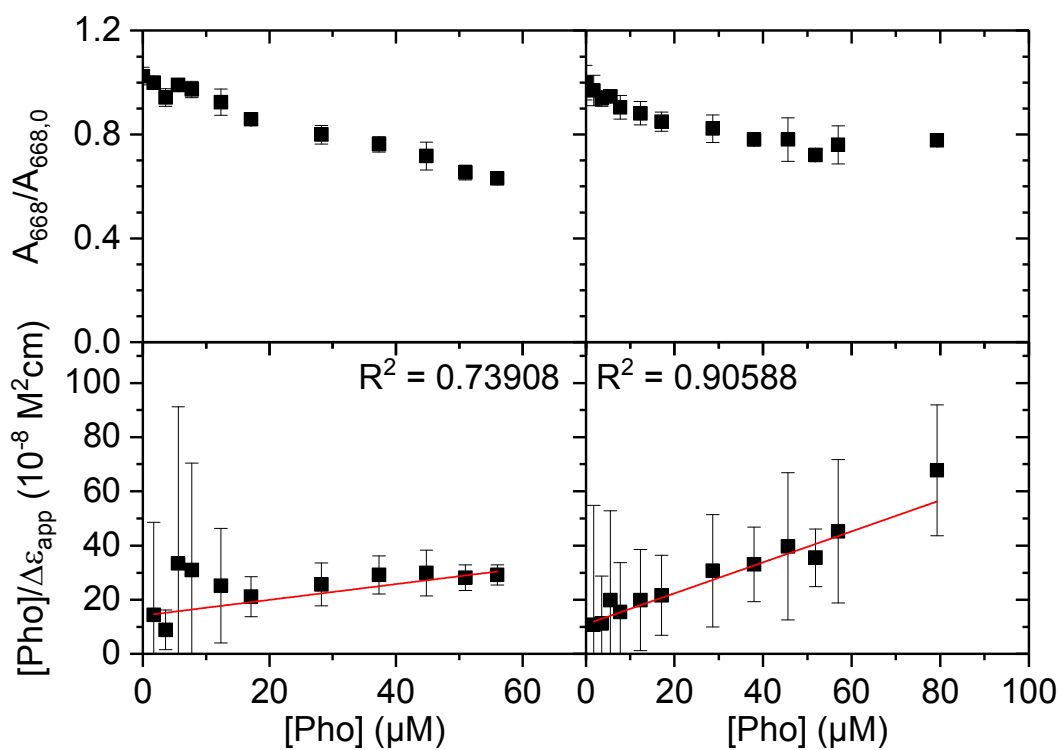

**Figure S6.** Additional independent concentration series and binding isotherms for Z shapes.

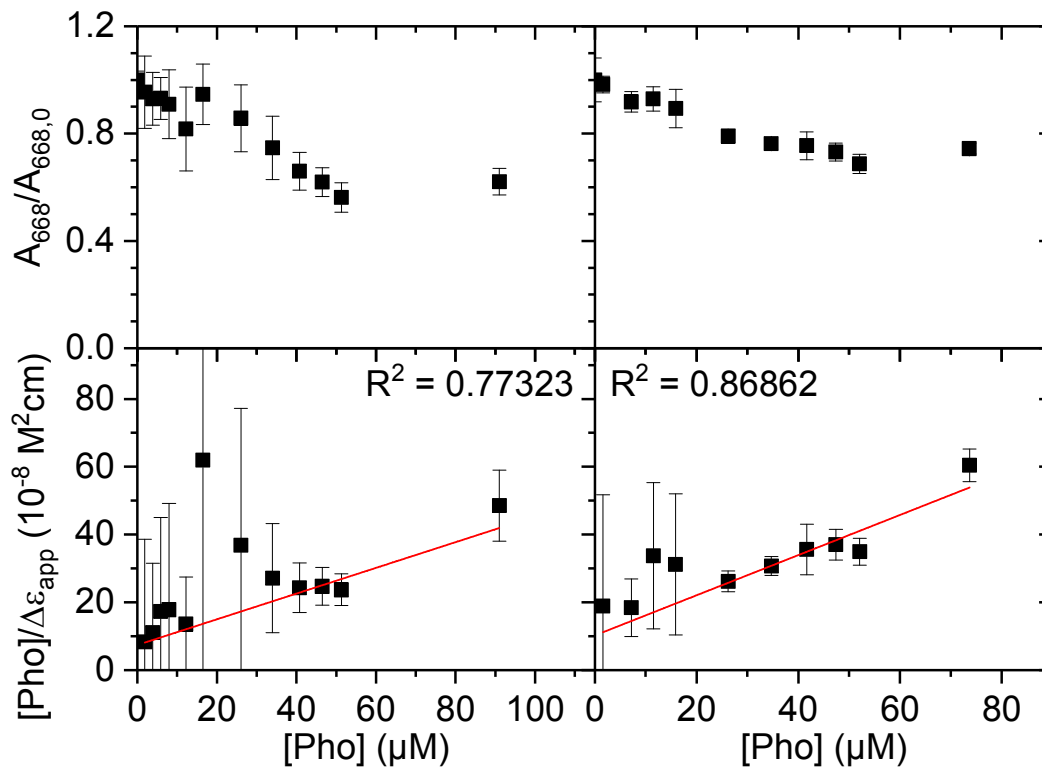

Figure S7. Additional independent concentration series and binding isotherms for triangles.

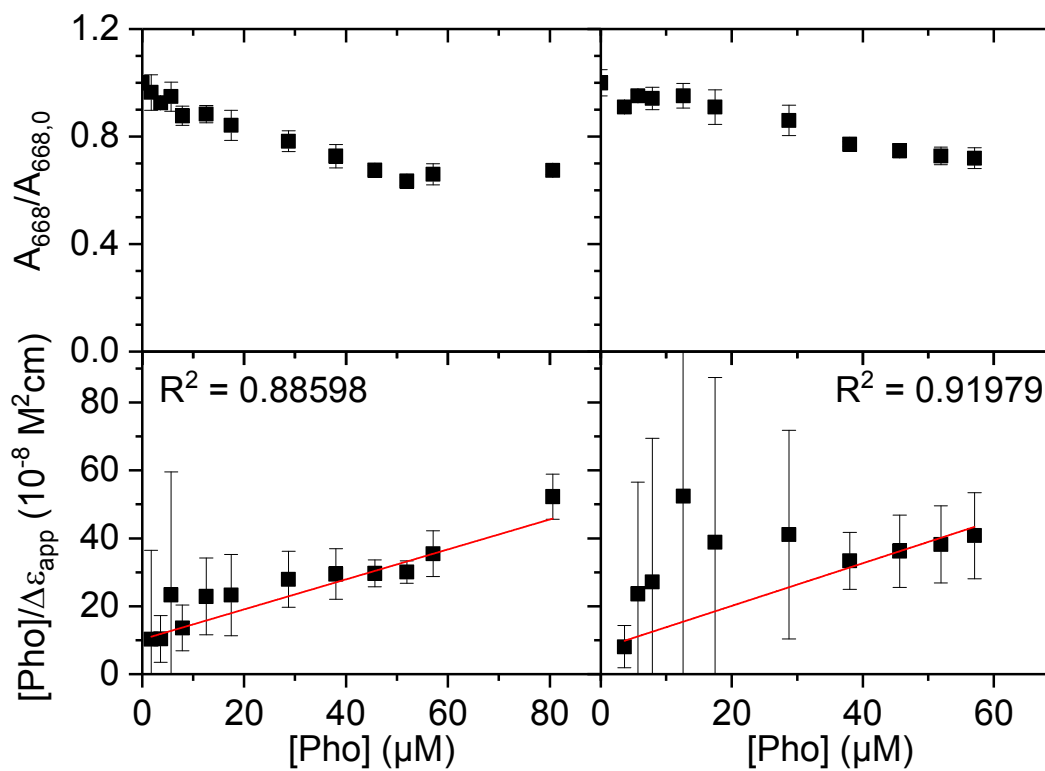

Figure S8. Additional independent concentration series and binding isotherms for bow ties.



## MB loading efficiency

**Table S2:** Average DNA origami concentrations at which saturation of the MB absorbance was observed and corresponding numbers of bound MB molecules per DNA origami.

| DNA origami     | saturation concentration (nM) | # MB per DNA origami |
|-----------------|-------------------------------|----------------------|
| <b>6HB</b>      | $2.9 \pm 0.5$                 | $6,897 \pm 1,160$    |
| <b>60HB</b>     | $3.5 \pm 0.6$                 | $5,714 \pm 951$      |
| <b>Z shape</b>  | $2.9 \pm 0.5$                 | $6,897 \pm 1,151$    |
| <b>triangle</b> | $3.0 \pm 0.2$                 | $6,667 \pm 479$      |
| <b>bow tie</b>  | $2.7 \pm 0.3$                 | $7,407 \pm 812$      |

## Averaging of $K_d$ values

**Table S3:** Individual  $K_d$  values (in  $\mu\text{M}$ ) of each DNA structure obtained in the independent concentration series and the resulting averaged  $K_d$  values (highlighted). The errors of the individual  $K_d$  values have been calculated from the errors of the fits (see Figs. S3 – S8) using full propagation of error. The averaged  $K_d$  values are listed with the standard errors of the mean as errors.

| dsDNA          | 6HB            | 60HB           | Z               | triangle        | bow tie        |
|----------------|----------------|----------------|-----------------|-----------------|----------------|
| $11.4 \pm 2.7$ | $10.9 \pm 2.3$ | $13.0 \pm 5.6$ | $23.8 \pm 7.3$  | $19.6 \pm 11.9$ | $11.0 \pm 3.0$ |
| $9.9 \pm 1.9$  | $11.5 \pm 3.3$ | $16.1 \pm 5.6$ | $48.7 \pm 18.5$ | $17.3 \pm 8.2$  | $12.0 \pm 4.9$ |
| $10.2 \pm 1.6$ |                | $15.1 \pm 3.3$ | $19.1 \pm 5.9$  | $15.0 \pm 5.4$  | $23.2 \pm 8.0$ |
| $10.2 \pm 1.2$ | $11.2 \pm 2.0$ | $14.6 \pm 3.0$ | $26.1 \pm 5.0$  | $17.1 \pm 4.7$  | $15.4 \pm 3.2$ |
